# Supplementary material
Source: PubMed Central journal article supplement (PMC7397111)
Supplement: supp_AC120.014770_161439_2_supp_552866_qcc6ln.pdf [file supp_AC120.014770_161439_2_supp_552866_qcc6ln.pdf]

**SUPPLEMENT**

**The orphan receptor GPR139 signals via Gq/11 to oppose opioid effects**

Hannah M Stoveken<sup>1</sup>, Stefano Zucca<sup>1</sup>, Ikuo Masuho<sup>1</sup>, Brock Grill<sup>1</sup> and Kirill A Martemyanov<sup>1\*</sup>

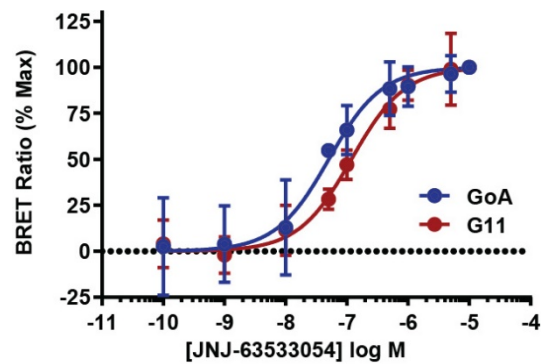

**Figure S1. GPR139 activates G11 and GoA with similar potency**

Using the G protein BRET fingerprinting assay, the efficacy of activation was measured over multiple doses of JNJ-63533054 and normalized within each experiment to the maximum dose tested. GoA exhibited slightly higher potency compared to G11.

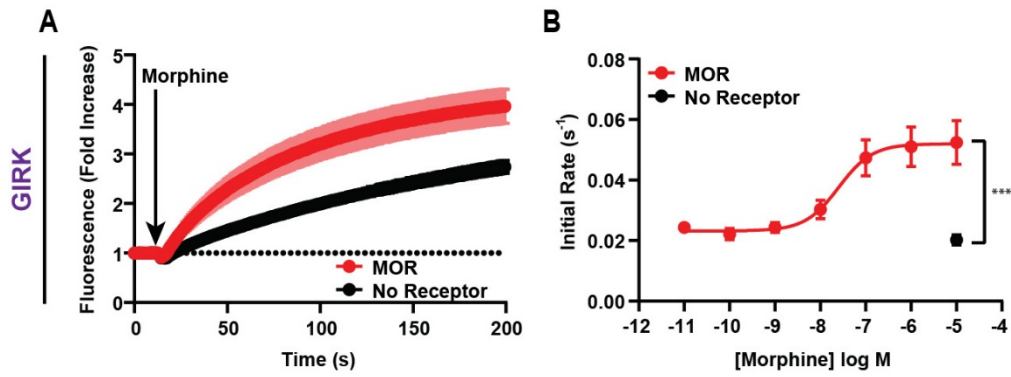

**Figure S2. MOR activates GIRK1/2 channels**

(A) Thallium flux through GIRK channels in control or MOR-expressing HEK293T cells was measured in response to 10  $\mu$ M morphine. (B) A dose response of morphine was tested and the initial activation rates were calculated in GraphPad Prism8. Data are mean  $\pm$  S.E.M. of 5 independent experiments. Students unpaired t-test, \*\*\* $p < 0.001$ .

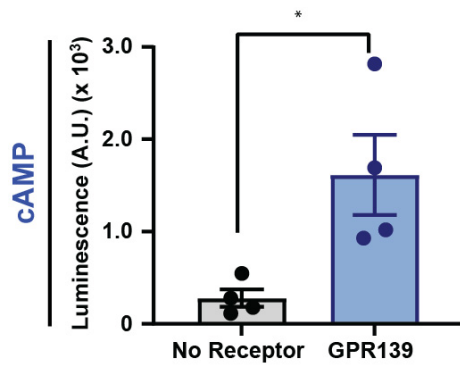

**Figure S3. Basal cAMP is increased in GPR139-transfected cells**

cAMP was measured in control or GPR139-expressing cells transfected with -22F pGloSensor®. Data are mean  $\pm$  S.E.M. of 4 independent experiments. Students unpaired t-test, \* $p < 0.05$ .

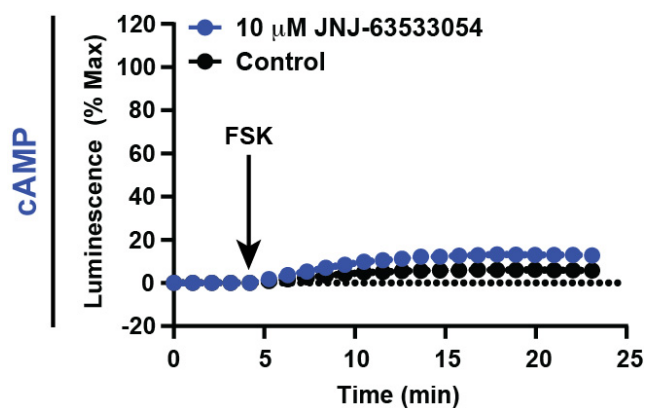

**Figure S4. JNJ-63533054 does not enhance cAMP generation in control cells**

HEK293T cells transfected with the -22F pGloSensor® were stimulated with 1 μM forskolin and pre-treated with vehicle or 10 μM JNJ-63533054. Data are mean ± S.E.M. of 5 independent experiments and normalized to the maximum response elicited by GPR139-transfected, JNJ-63533054-treated cells (Fig 3A, blue line).

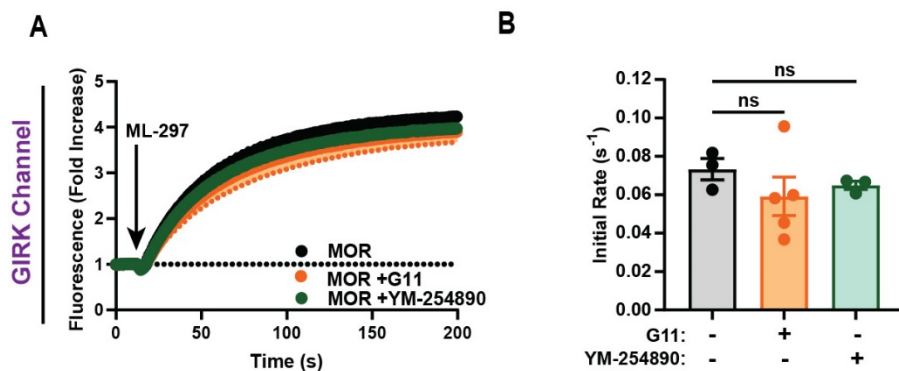

**Figure S5. MOR does not affect GIRK opening mediated by ML-297**

(A) GIRK channel activity was assessed in MOR-expressing or MOR + G11-expressing HEK293T cells following stimulation with 10  $\mu$ M ML-297. MOR-expressing cells were additionally treated with vehicle or 10  $\mu$ M YM-254890. (B) Quantification of the initial GIRK channel activation rates. Data are mean  $\pm$  S.E.M. of 3-5 independent experiments. One-way ANOVA with Tukey's post hoc, ns, not significant.

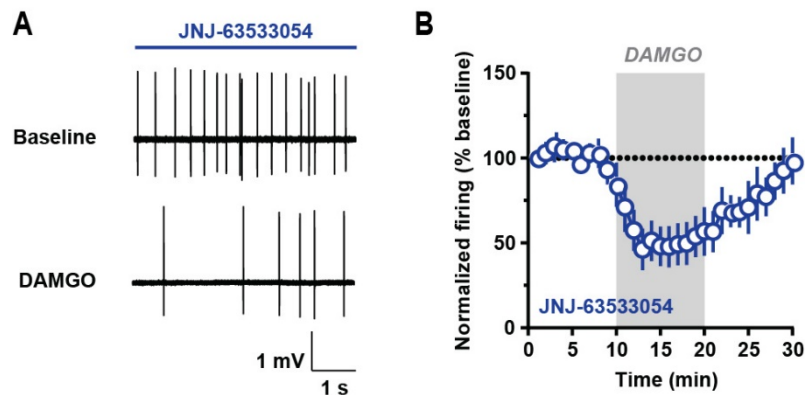

**Figure S6. JNJ-63533054 does not affect DAMGO-mediated firing inhibition in *GPR139*<sup>-/-</sup> mice.**

(A) Representative firing traces and (B) normalized firing rates recorded from medial habenula neurons in prepared slices from *GPR139* knockout mice. Slices were treated with 1  $\mu$ M DAMGO and pre-treated with 10  $\mu$ M JNJ-63533.
